# Supplementary material for: Meta-Analysis on the Chinese Herbal Formula Xiaoer-Feike Granules as a Complementary Therapy for Children With Acute Lower Respiratory Infections
Source: PubMed Central journal article supplement (PMC7642815; doi:10.3389/fphar.2020.496348), 2020-10-22
Supplement: DataSheet_1.pdf [file DataSheet_1.pdf]

**Meta-analysis on Chinese herbal formula *Xiaoer-Feike granule* as complementary therapy for children with acute lower respiratory infection**

**Methods.** XFG was extracted by methanol and ultrasonic for 1h (220V, 500W, 50kHz) (Shanghai Gutel ultrasonic equipment co., LTD). Reference substances were dissolved in methanol. The compositions were detected by the UV detector using an Agilent 1260 and Agilent 1290 Series HPLC system (Agilent Technologies Inc., USA). The compounds were separated on an Agilent ZORBAX SB C18 column (4.6 mm ×250 mm, 5μm).

**Chemicals.** High purity water, HPLC-grade acetonitrile and methyl alcohol (TEDIA, Ohio, America) were used after filtration through a 0.2 μm membrane filter. HPLC-grade phosphoric acid (Shanghai Aladdin biochemical technology co., LTD, Shanghai, China).

**TABLE 1 |** the source and batch number of reference substances

| Reference substance | Source                                                         | Batch number |
|---------------------|----------------------------------------------------------------|--------------|
| Chrysophanol        | Sichuan Weikeqi Biological Technology Co., Ltd, Chengdu, China | WKQ19012503  |
| Atractylenolide I   | Sichuan Weikeqi Biological Technology Co., Ltd, Chengdu, China | WKQ17062303  |
| AtractylenolideIII  | Sichuan Weikeqi Biological Technology Co., Ltd, Chengdu, China | WKQ16092604  |
| Ginsenoside Re      | Sichuan Weikeqi Biological Technology Co., Ltd, Chengdu, China | WKQ18121407  |
| Ginsenoside Rb1     | Sichuan Weikeqi Biological Technology Co., Ltd, Chengdu, China | WKQ19012107  |
| Rhein               | Sichuan Weikeqi Biological Technology Co., Ltd, Chengdu, China | WKQ19030402  |

|                  |                                                                              |               |
|------------------|------------------------------------------------------------------------------|---------------|
| Ginsenoside Rg1  | Sichuan Weikeqi Biological Technology Co., Ltd,<br>Chengdu, China            | WKQ19040208   |
| Shionone         | Sichuan Weikeqi Biological Technology Co., Ltd,<br>Chengdu, China            | WKQ19042901   |
| Tussilagone      | Sichuan Weikeqi Biological Technology Co., Ltd,<br>Chengdu, China            | WKQ19042510   |
| Hesperidin       | Chengdu institute of biology, Chinese academy of<br>sciences, Chengdu, China | MUST-18042205 |
| Nobiletin        | Chengdu institute of biology, Chinese academy of<br>sciences, Chengdu, China | MUST-18032502 |
| Tangeretin       | Chengdu herbpurify biotechnology co., LTD,<br>Chengdu, China                 | J-022-150730  |
| Scopoletin       | Chengdu herbpurify biotechnology co., LTD,<br>Chengdu, China                 | —             |
| Emodin           | National Institutes for Food and Drug Control,<br>Beijing, China             | CVX4-E9JJ     |
| Aloe-emodin      | National Institutes for Food and Drug Control,<br>Beijing, China             | IQLS-EFVV     |
| Physcion         | National Institutes for Food and Drug Control,<br>Beijing, China             | 110758-200610 |
| Chlorogenic acid | Chengdu Chroma-biotechnology Co., Ltd,<br>Chengdu, China                     | CHB170713     |

## HPLC chromatograms

**Hesperidin:** Solvent system, acetonitrile and water with 0.1% phosphoric acid with gradient elution program: 0-10 min, 20-30% acetonitrile; 10-20 min, 30-50 % acetonitrile, 20-25 min, 50-52% acetonitrile, 25-30 min, 52% acetonitrile, 30-35 min, 52-95 % acetonitrile, 35-37 min, 95% acetonitrile; flow rate 0.7ml/min, UV detection wavelength 283nm.

A

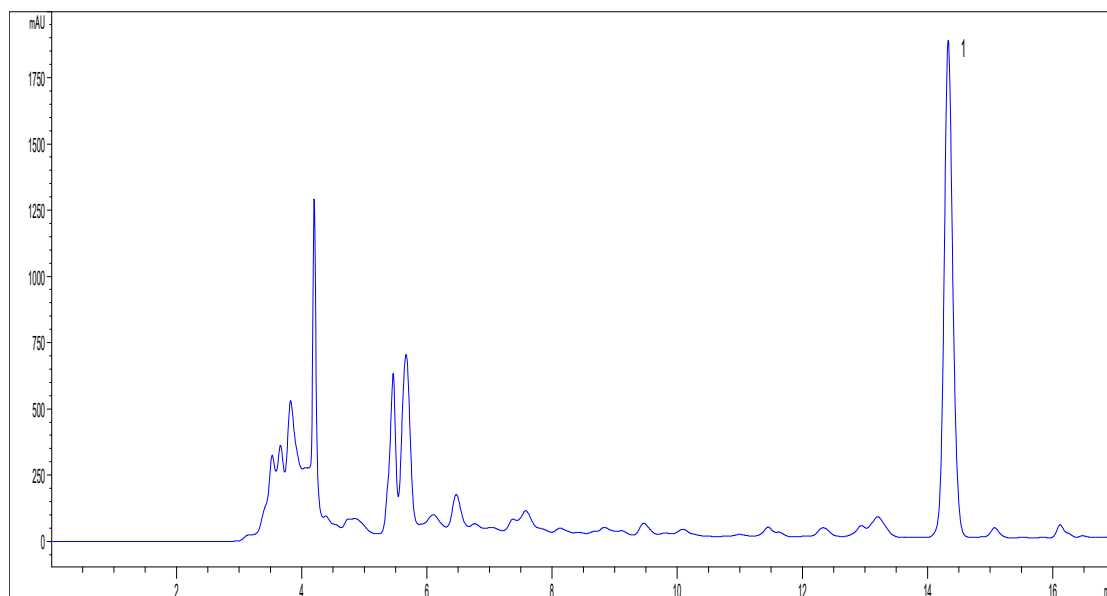

**B**

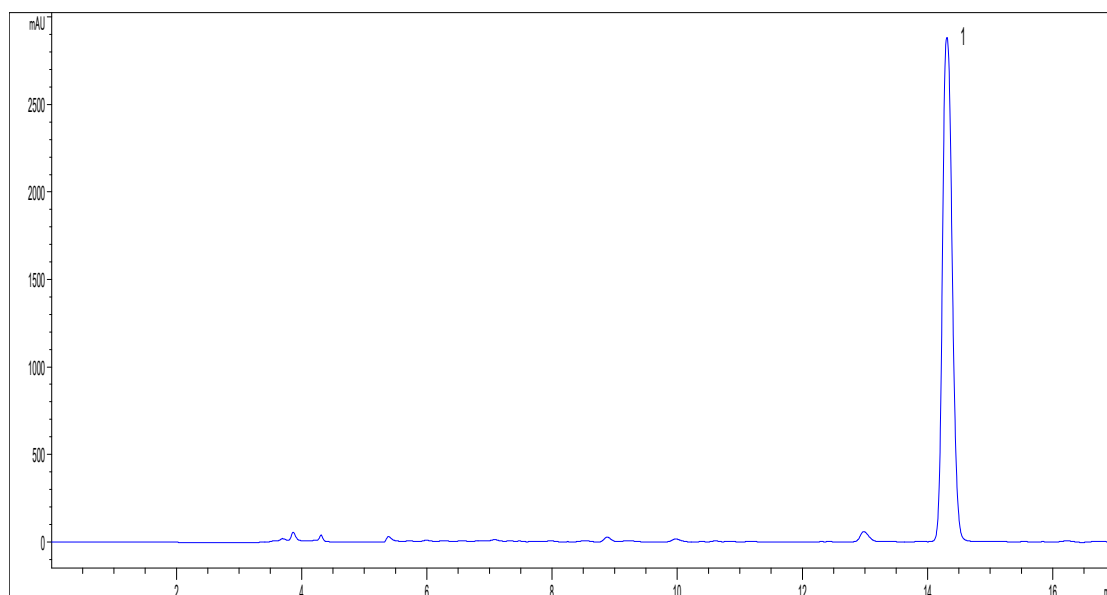

**FIGURE 1 |** HPLC chromatograms of A: XFG methanol extract and B: Hesperidin reference

**Nobiletin and Tangeretin:** Solvent system, acetonitrile and water with 0.1% phosphoric acid with gradient elution program: 0-10 min, 20-30% acetonitrile; 10-20 min, 30-50 % acetonitrile, 20-25 min, 50-52% acetonitrile, 25-30 min, 52% acetonitrile, 30-35 min, 52-95 % acetonitrile, 35-37 min, 95% acetonitrile; flow rate 0.7ml/min, UV detection

wavelength 335nm.

A

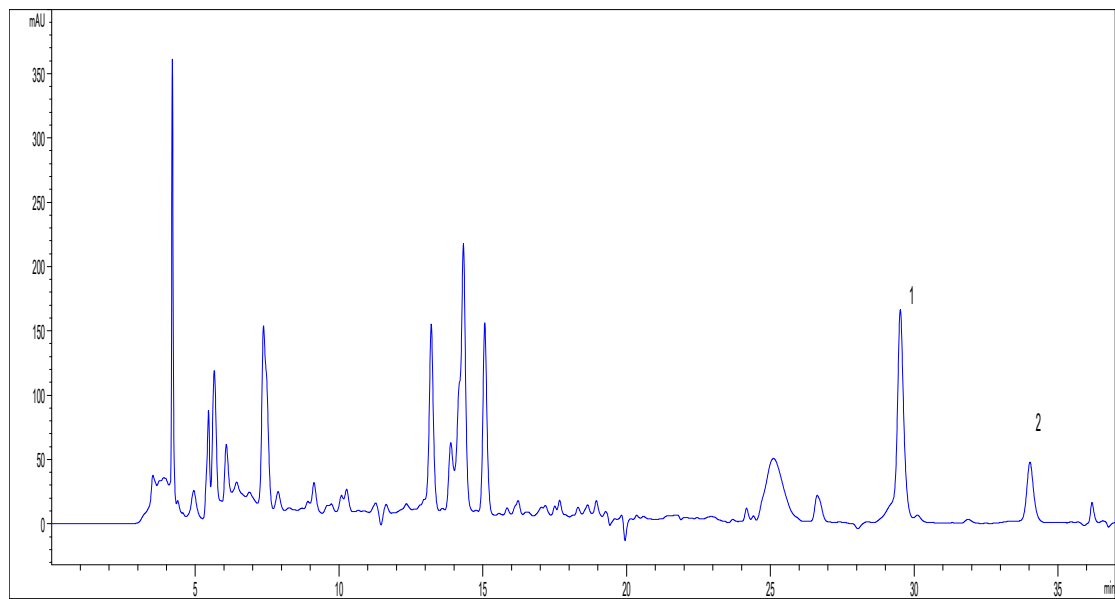

B

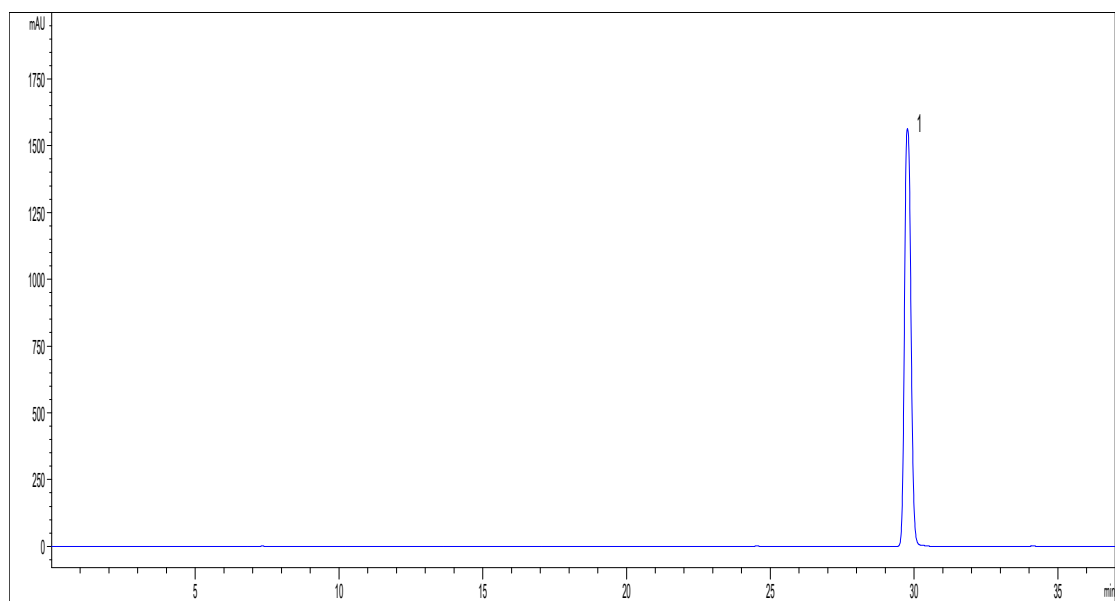

C

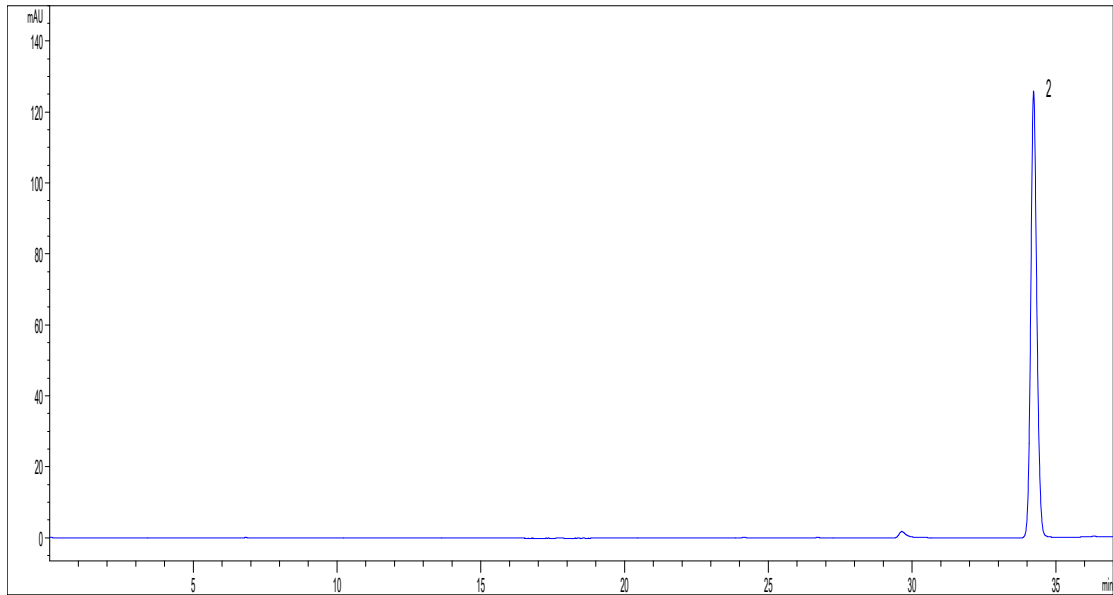

**FIGURE 2 |** HPLC chromatograms of A: XFG methanol extract, B: Nobiletin reference and C: Tangeretin reference

**Aolemodin, rhein, emodin, chrysophanol and physcion:** Solvent system, 78% methyl alcohol and 22% water with 0.1% phosphoric acid, flow rate 1.0 ml/min, UV detection wavelength 254 nm

A

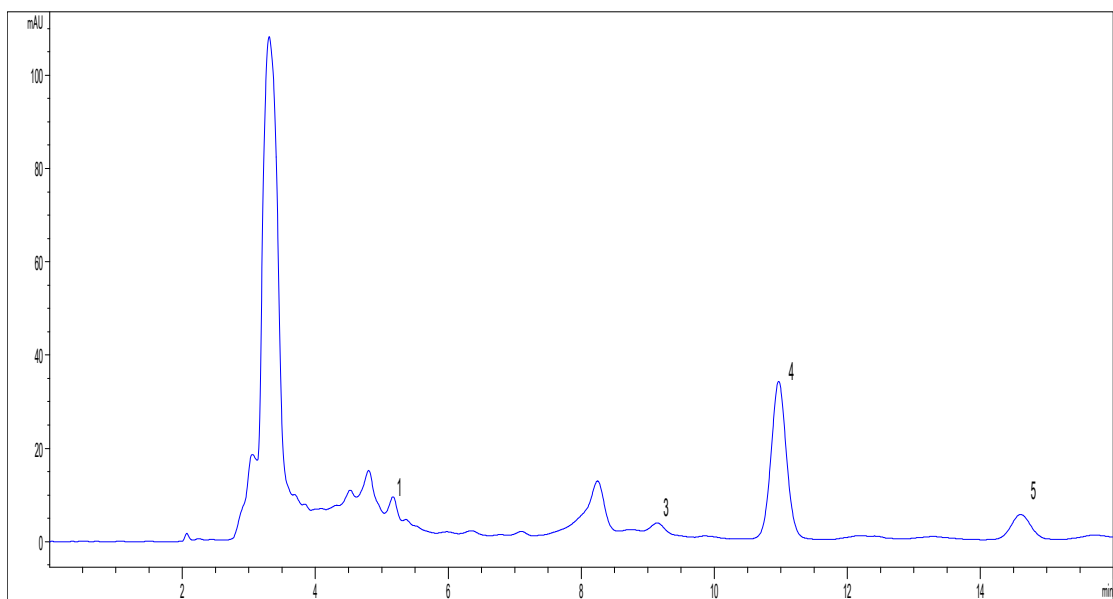

B

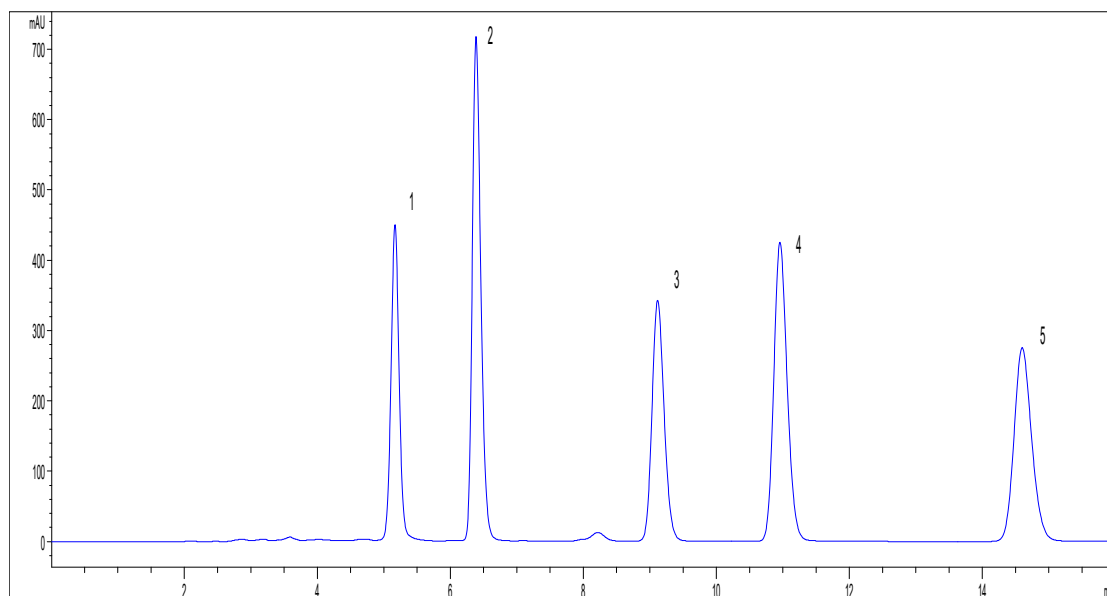

**FIGURE 3 |** HPLC chromatograms of A: XFG methanol extract, B1: Aolemodin reference, B2: rhein reference, B3: emodin reference, B4: chrysophanol reference and B5: physcion reference

**Ginsenoside Rg1, Ginsenoside Re and Ginsenoside Rb1:** Solvent system, acetonitrile and water with gradient elution program: 0-35 min, 19% acetonitrile; 35-55 min, 19-29% acetonitrile, 55-70 min, 29% acetonitrile, and 70-100 min, 29-40% acetonitrile, flow rate 1.0 ml/min, UV detection wavelength 203 nm

A

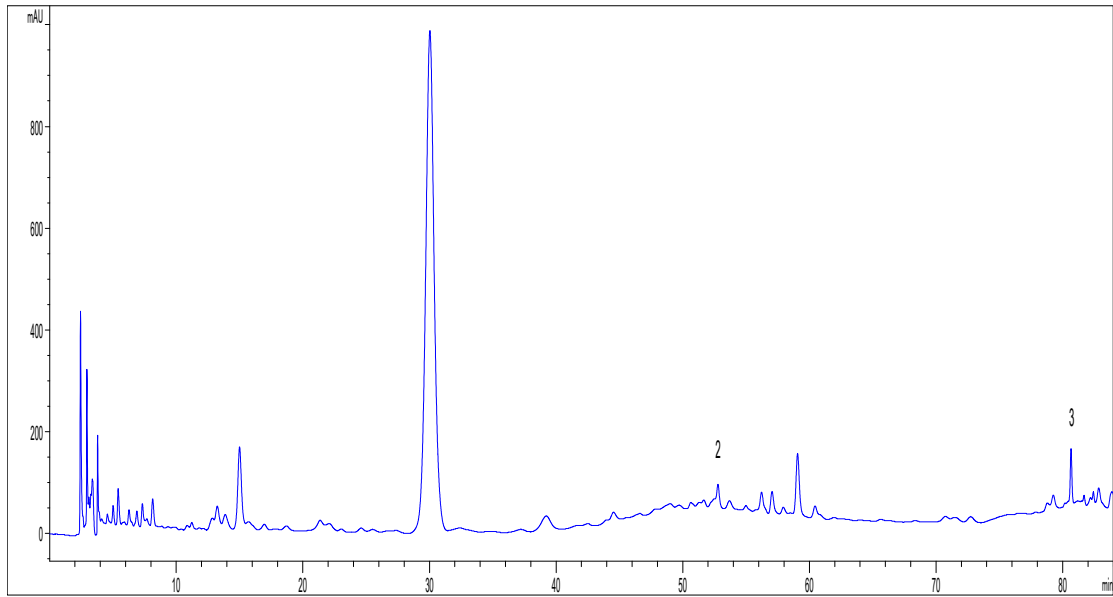

**B**

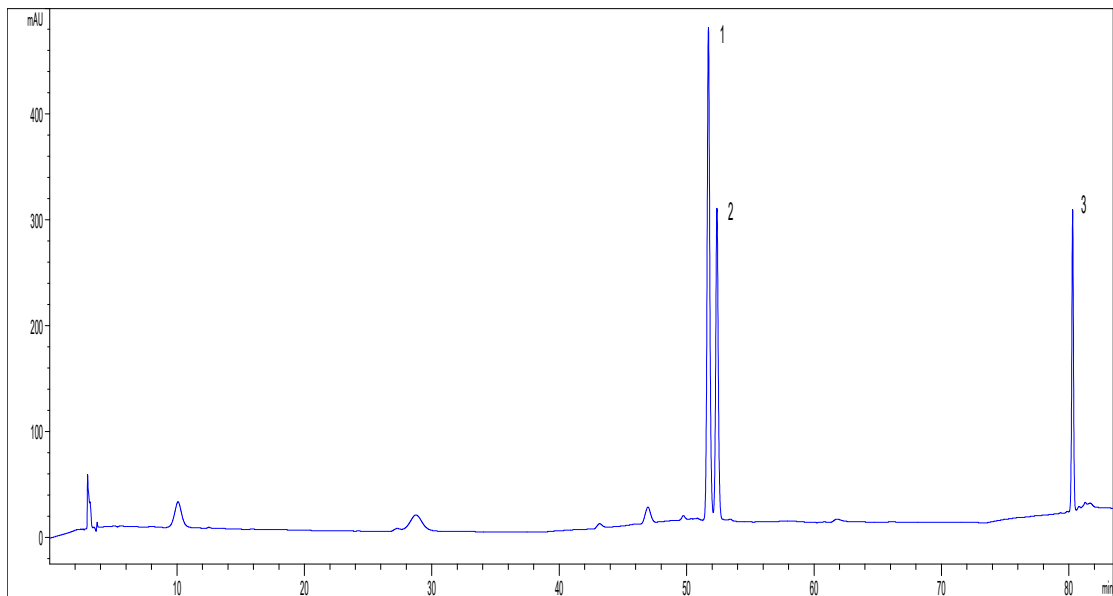

**FIGURE 4 |** HPLC chromatograms of A: XFG methanol extract, B1: Ginsenoside Rg1 reference, B2: Ginsenoside Re reference and B3: Ginsenoside Rb1 reference

**Tussilagone:** Solvent system, 85% methyl alcohol and 15% water, flow rate 1.0 ml/min, UV detection wavelength 220 nm

**A**

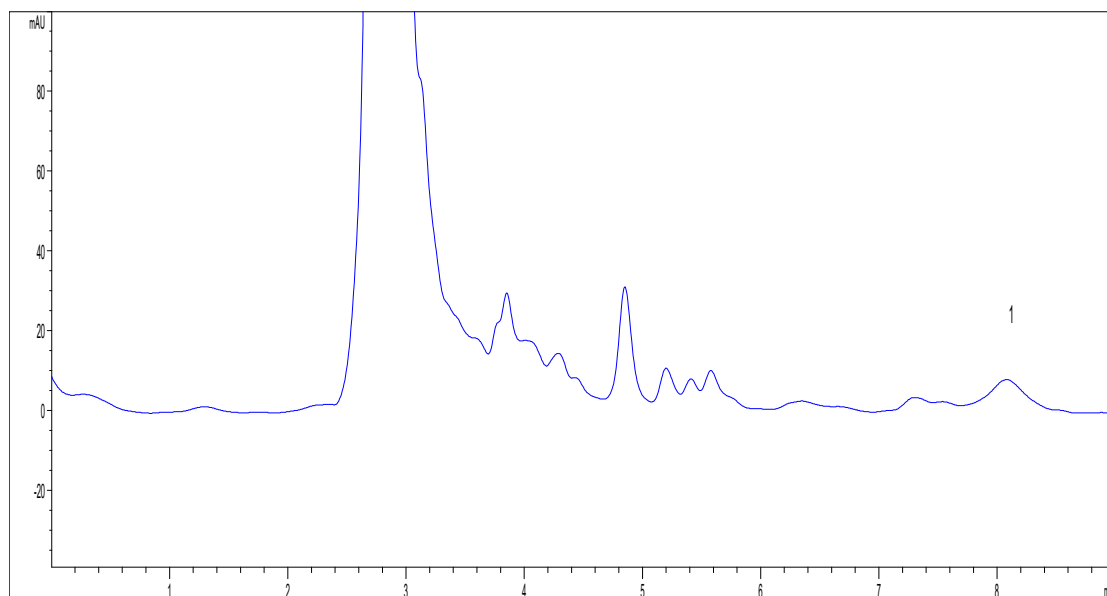

**B**

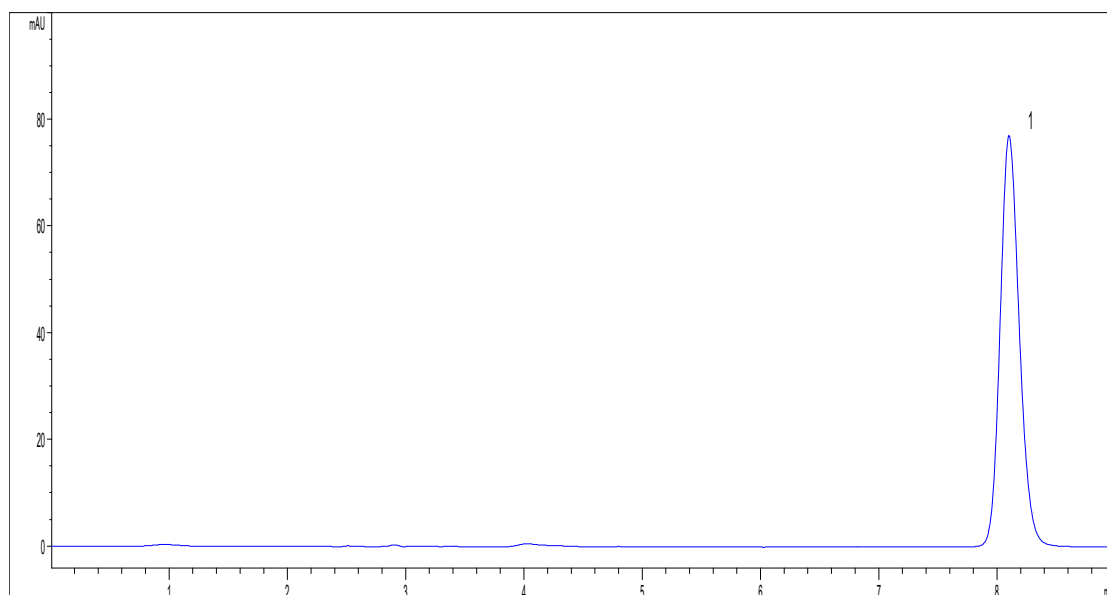

**FIGURE 5 |** HPLC chromatograms of A: XFG methanol extract and B: Tussilagone reference

**Shionone:** Solvent system, 96% acetonitrile and 4% water, flow rate 1.0 ml/min, UV detection wavelength 200 nm

**A**



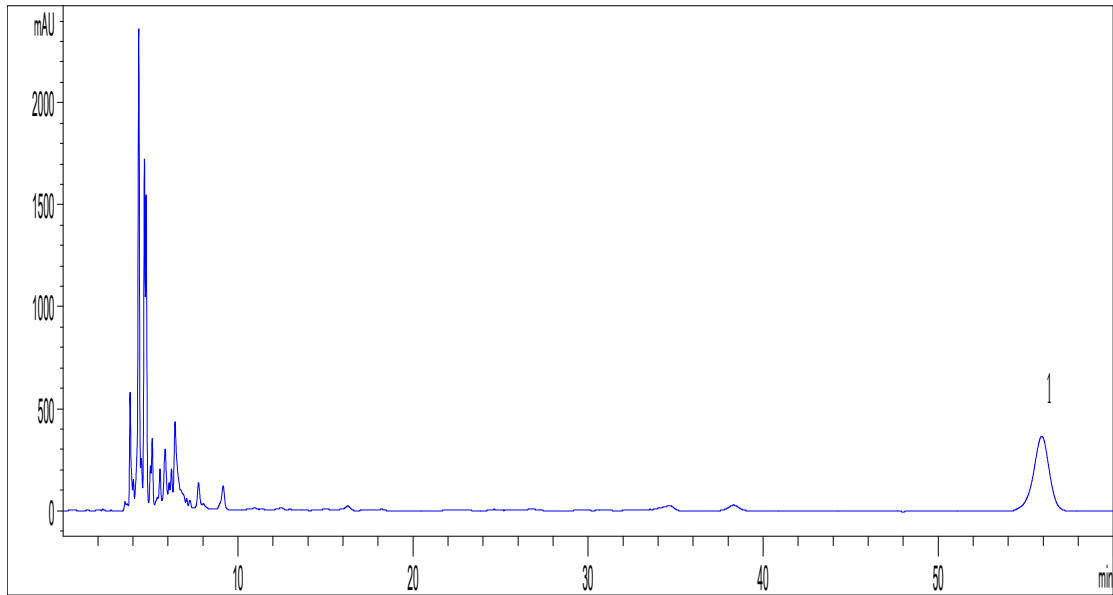

B

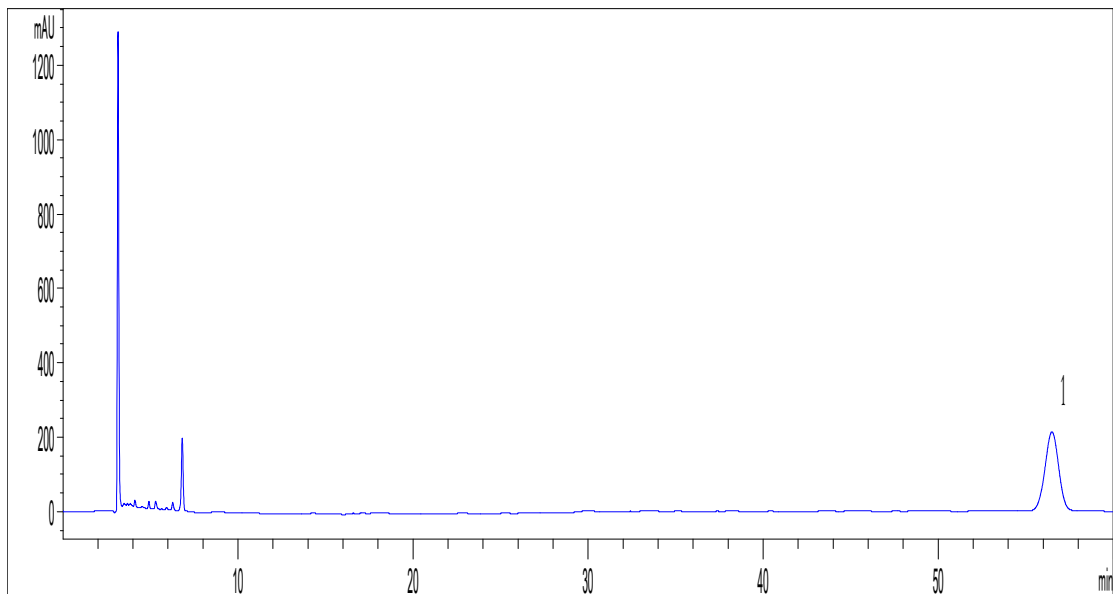

**FIGURE 6** | HPLC chromatograms of A: XFG methanol extract and B: Shionone reference

**Atractylenolide III and Atractylenolide I:** Solvent system, 80% methyl alcohol and 20% water, flow rate 1.0 ml/min, UV detection wavelength 220 nm

A

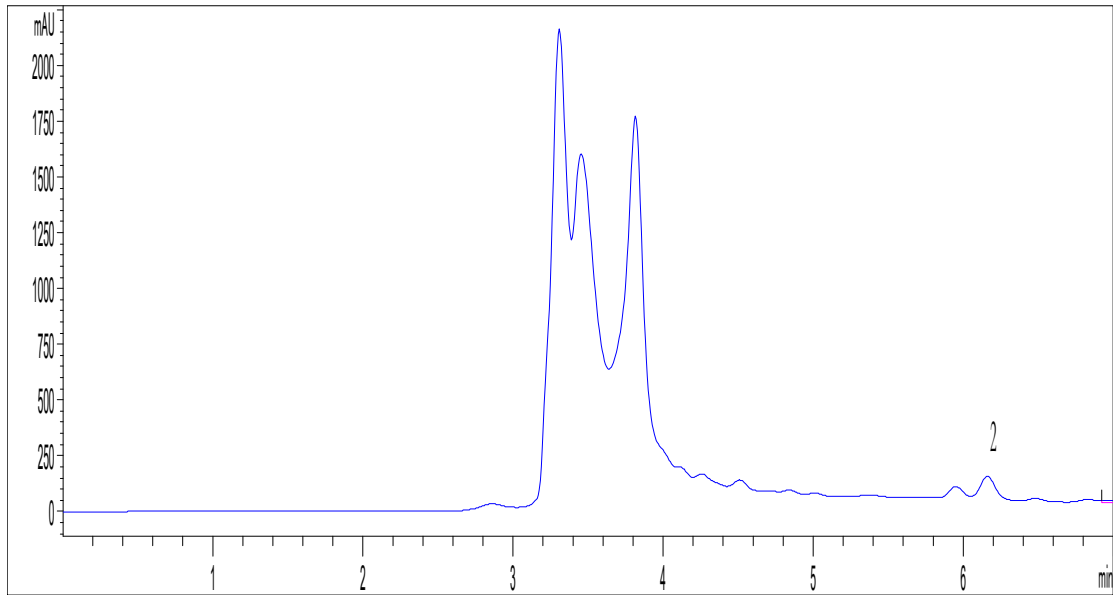

**B**

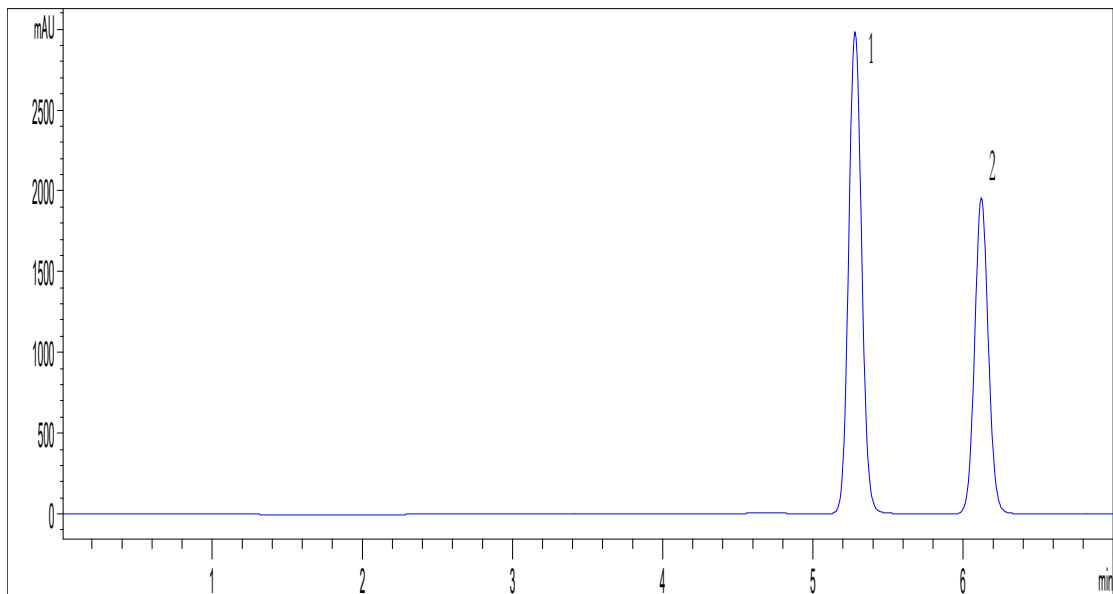

**FIGURE 7 |** HPLC chromatograms of A: XFG methanol extract, B1: Atractylenolide III and B2: Atractylenolide I reference

**Chlorogenic acid:** Solvent system, 75% acetonitrile and 25% water  
with 0.1% phosphoric acid, flow rate 1.0 ml/min, UV detection  
wavelength 330 nm

A

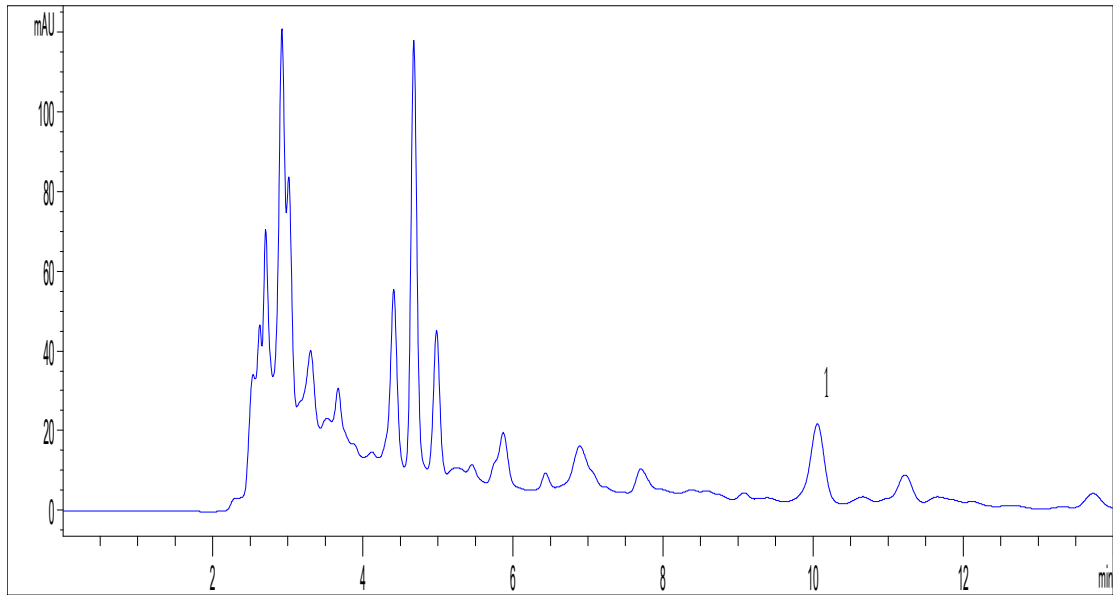

B

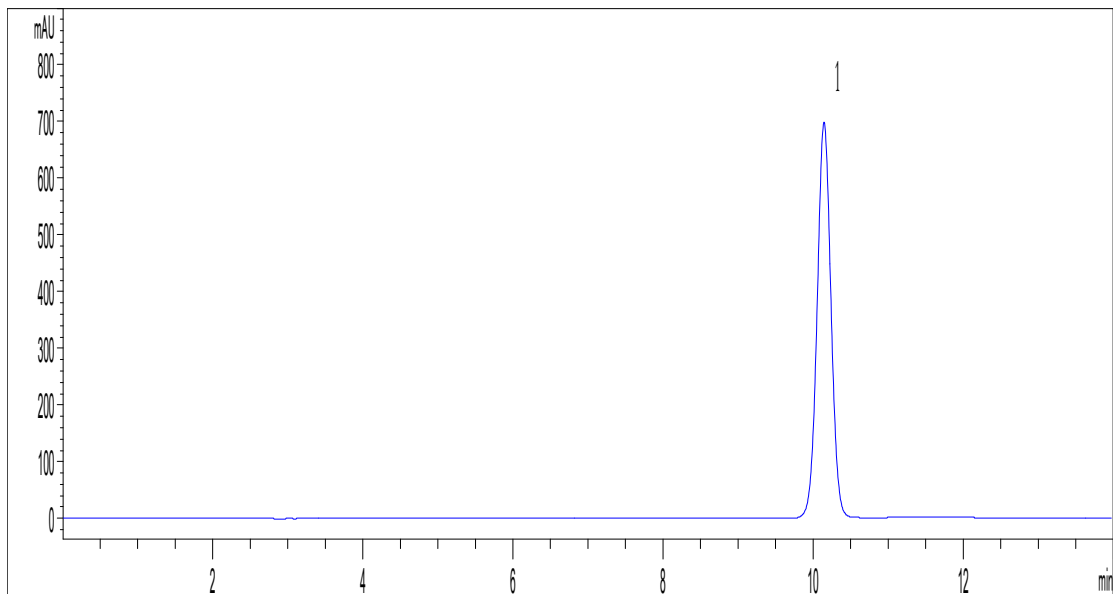

**FIGURE 8 |** HPLC chromatograms of A: XFG methanol extract and B: Chlorogenic acid reference

**Scopoletin:** Solvent system, 72% acetonitrile and 28% water with 0.1% phosphoric acid flow rate 1.0 ml/min, UV detection wavelength 355

nm

A

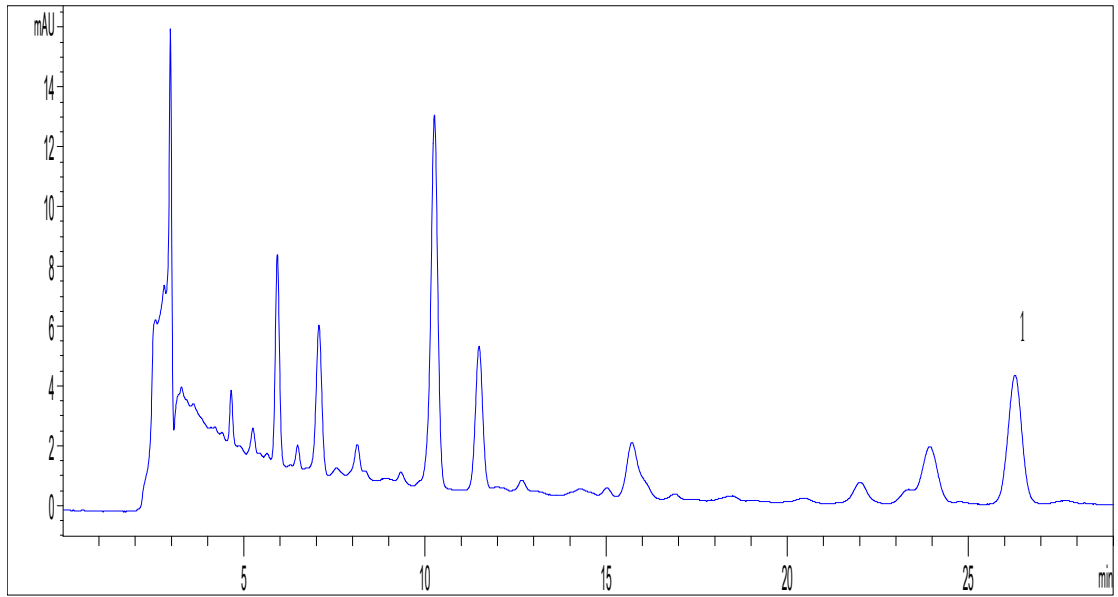

**B**

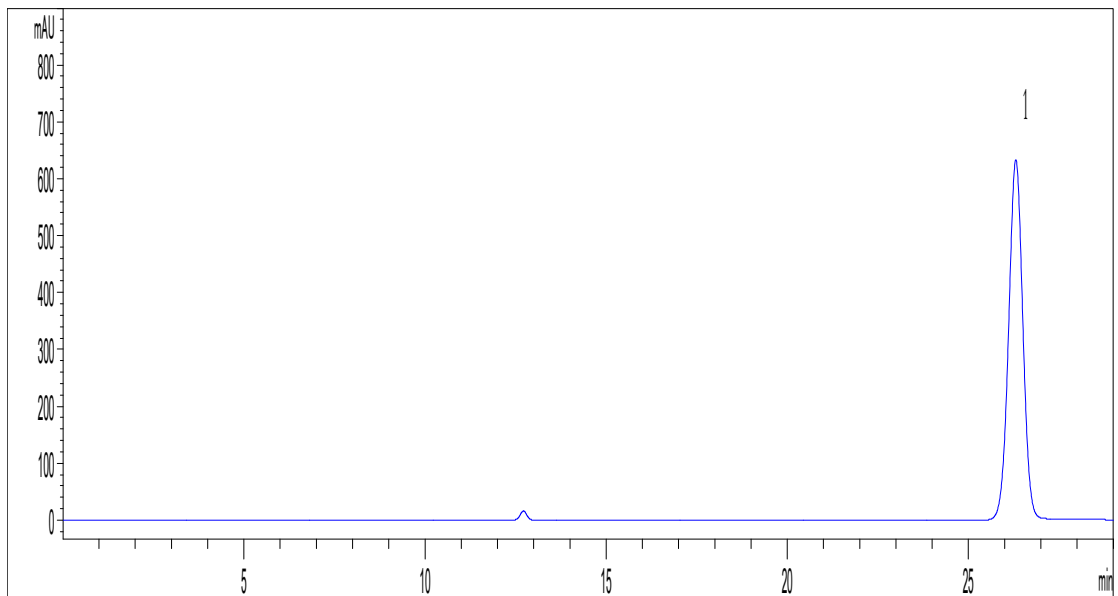

**FIGURE 9 |** HPLC chromatograms of A: XFG methanol extract and B: Scopoletin reference
