# Supplementary material for: Meta-Analysis on the Chinese Herbal Formula Xiaoer-Feike Granules as a Complementary Therapy for Children With Acute Lower Respiratory Infections
Source: PubMed Central journal article supplement (PMC7642815; doi:10.3389/fphar.2020.496348), 2020-10-22
Supplement: DataSheet_2.pdf [file DataSheet_2.pdf]

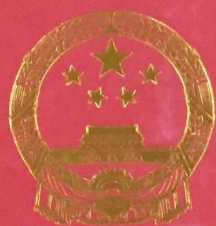

**PHARMACOPOEIA**  
OF THE PEOPLE'S REPUBLIC OF CHINA

**2015**

Volume I

Chinese Pharmacopoeia Commission

China Medical Science Press

- Xiao'er Feike Keli 1844  
 Xiao'er Feire Kechuan Koufuye 1846  
 Xiao'er Feire Kechuan Mixture 1846  
 Xiao'er Feireping Capsules 1847  
 Xiao'er Feireping Jiaonang 1847  
 Xiao'er Fuqi Zhixie Powder 1848  
 Xiao'er Fuqi Zhixie San 1848  
 Xiao'er Fuxiening Syrup 1848  
 Xiao'er Fuxiening Tangjiang 1848  
 Xiao'er Ganmao Cha 1850  
 Xiao'er Ganmao Granules 1852  
 Xiao'er Ganmao Keli 1852  
 Xiao'er Ganmao Koufuye 1852  
 Xiao'er Ganmao Medicinal Teas 1850  
 Xiao'er Ganmao Mixture 1852  
 Xiao'er Ganmaoning Syrup 1853  
 Xiao'er Ganmaoning Tangjiang 1853  
 Xiao'er Ganyan Granules 1849  
 Xiao'er Ganyan Keli 1849  
 Xiao'er Huadu Powder 1854  
 Xiao'er Huadu San 1854  
 Xiao'er Huashi Koufuye 1855  
 Xiao'er Huashi Mixture 1855  
 Xiao'er Huashi Pills 1856  
 Xiao'er Huashi Wan 1856  
 Xiao'er Jiebiao Granules 1857  
 Xiao'er Jiebiao Keli 1857  
 Xiao'er Jiegan Pian 1858  
 Xiao'er Jiegan Tablets 1858  
 Xiao'er Jiere Pills 1860  
 Xiao'er Jiere Wan 1860  
 Xiao'er Jindan Pian 1861  
 Xiao'er Jindan Tablets 1861  
 Xiao'er Jingfeng Powder 1861  
 Xiao'er Jingfeng San 1861  
 Xiao'er Kangxian Capsules 1862  
 Xiao'er Kangxian Jiaonang 1862  
 Xiao'er Kechuan Granules 1863  
 Xiao'er Kechuan Keli 1863  
 Xiao'er Qingfei Huatan Koufuye 1866  
 Xiao'er Qingfei Huatan Mixture 1866  
 Xiao'er Qingfei Zhike Pian 1867  
 Xiao'er Qingfei Zhike Tablets 1867  
 Xiao'er Qingre Pian 1869  
 Xiao'er Qingre Tablets 1869  
 Xiao'er Qingre Zhike Heji (Xiao'er Qingre Zhike Koufuye) 1870  
 Xiao'er Qingre Zhike Mixture 1870  
 Xiao'er Qixingcha Granules 1864  
 Xiao'er Qixingcha Keli 1864  
 Xiao'er Qixingcha Koufuye 1865  
 Xiao'er Qixingcha Mixture 1865  
 Xiao'er Resuqing Granules 1871  
 Xiao'er Resuqing Keli 1871  
 Xiao'er Resuqing Koufuye 1872  
 Xiao'er Resuqing Mixture 1872  
 Xiao'er Resuqing Syrup 1874  
 Xiao'er Resuqing Tangjiang 1874  
 Xiao'er Tuire Granules 1876  
 Xiao'er Tuire Heji (Xiao'er Tuire Koufuye) 1875  
 Xiao'er Tuire Keli 1876  
 Xiao'er Tuire Mixture 1875  
 Xiao'er Xiaoshi Tablets 1880  
 Xiao'er Xiangju Pills 1877  
 Xiao'er Xiangju Wan 1877  
 Xiao'er Xiaoji Zhike Koufuye 1879  
 Xiao'er Xiaoji Zhike Mixture 1879  
 Xiao'er Xiaoshi Pian 1880  
 Xiao'er Xieli Pian 1881  
 Xiao'er Xieli Tablets 1881  
 Xiao'er Xiesuting Granules 1882  
 Xiao'er Xiesuting Keli 1882  
 Xiao'er Yanbian Granules 1883  
 Xiao'er Yanbian Keli 1883  
 Xiao'er Zhibao Pills 1886  
 Xiao'er Zhibao Wan 1886  
 Xiao'er Zhike Syrup 1884  
 Xiao'er Zhike Tangjiang 1884  
 Xiao'er Zhisou Syrup 1885  
 Xiao'er Zhisou Tangjiang 1885  
 Xiaochaihu Capsules 1833  
 Xiaochaihu Effervescent Tablets 1835  
 Xiaochaihu Granules 1834  
 Xiaochaihu Jiaonang 1833  
 Xiaochaihu Keli 1834  
 Xiaochaihu Paotengpian 1835  
 Xiaochaihu Pian 1836  
 Xiaochaihu Tablets 1836  
 Xiaocuo Pills 1804  
 Xiaocuo Wan 1804  
 Xiaohuoluo Pills 1888  
 Xiaohuoluo Wan 1888  
 Xiaojianzhong Granules 1889  
 Xiaojianzhong Heji 1888  
 Xiaojianzhong Keli 1889  
 Xiaojianzhong Mixture 1888  
 Xiaojianzhong Pian 1890  
 Xiaojianzhong Tablets 1890  
 Xiaojin Capsules 1892  
 Xiaojin Jiaonang 1892  
 Xiaojin Pian 1893  
 Xiaojin Pills 1894  
 Xiaojin Tablets 1893  
 Xiaojin Wan 1894  
 Xiaoke Pills 1808  
 Xiaoke Wan 1808  
 Xiaokechuan Tangjiang 1805  
 Xiaokeling Pian 1806  
 Xiaokeling Tablets 1806  
 Xiaokeping Pian 1806  
 Xiaokeping Tablets 1806  
 Xiaoluotong Capsules 1809  
 Xiaoluotong Jiaonang 1809  
 Xiaoluotong Pian 1810  
 Xiaoluotong Tablets 1810  
 Xiaomi Shuan 1810  
 Xiaomi Suppositories 1810  
 Xiaoqinglong Granules 1896  
 Xiaoqinglong Heji 1895  
 Xiaoqinglong Keli 1896  
 Xiaoqinglong Mixture 1895  
 Xiaoshi Tuire Syrup 1811  
 Xiaoshi Tuire Tangjiang 1811  
 Xiaoshuan Granules 1812  
 Xiaoshuan Keli 1812  
 Xiaoshuan Koufuye 1813  
 Xiaoshuan Mixture 1813  
 Xiaoshuan Tongluo Capsules 1814  
 Xiaoshuan Tongluo Granules 1815  
 Xiaoshuan Tongluo Jiaonang 1814  
 Xiaoshuan Tongluo Keli 1815  
 Xiaoshuan Tongluo Pian 1817

reference to the peak of forsythin.

**Reference solution** Dissolve a quantity of forsythin CRS, accurately weighed, in methanol to produce a solution containing 0.1 mg of forsythin per ml.

**Test solution** Pulverize the contents obtained under the test of packing variation, weigh accurately about 2 g in a stoppered conical flask, add accurately 25 ml of methanol, stopper and weigh, ultrasonicate (power 300 W, frequency 50 kHz) for 30 minutes, allow to cool and weigh again, replenish the loss of weight with methanol, mix well and filter, Measure accurately 10 ml of the successive filtrate, evaporate to dryness, dissolve the residue with 5 ml of 70% ethanol, apply to a neutral aluminium oxide column (100-200 mesh, 2 g, 1.5 cm in diameter), elute with 80 ml of 70% ethanol, collect the eluates, evaporate to dryness, dissolve the residue with 50% methanol, transfer to a 5 ml volumetric flask, dilute to volume with 50% methanol, mix well and filter, use the successive filtrate as the test solution.

**Procedure** Inject accurately 10  $\mu$ l of each of the reference solution and test solution into the column, determine and calculate the content.

It contains not less than 0.68 mg of forsythin ( $C_{27}H_{34}O_{11}$ ) per pack for [Strength (1) and (3)], 1.36 mg of forsythin ( $C_{27}H_{34}O_{11}$ ) per pack for [Strength (2) and (4)], referred to Forsythiae Fructus.

**Actions** To disperse wind, release the exterior, clear heat and remove food stagnation.

**Indications** Pattern of wind-heat common cold with food stagnation, manifested as fever, cough, runny nose, runny nose, red and swelling throat, poor appetite, distention and fullness in the epigastrium and abdomen, constipation or sour fetid stool, and deep yellow urine.

**Administration and Dosage** Take the medicine orally after mixing it with hot water, 1-2 g per time for children between 6 months and 1 year old; 2-3 g per time for 1 to 3 year-old children, 3-4 g per time for 4 to 6 year-old children; 4-5 g per time for 7 to 9 year-old children; 6 g per time for children more than 10 years old. Three times a day.

**Strength** (1) 2 g per pack  
(2) 4 g per pack  
(3) 2 g per pack (without sucrose)  
(4) 4 g per pack (without sucrose)

**Storage** Preserve in tightly closed containers.

## Xiao'er Feike Keli

### (小儿肺咳颗粒)

Xiao'er Feike Granules

**Ingredients** Ginseng Radix et Rhizoma 20 g; Poria 20 g; Macrocephalae Rhizoma 8 g; Citri Pericarpium Reticulatae 20 g; Galli Gigerii Endothelium Corneum 20 g; Rhei Radix et Rhizoma (processed with wine) 12 g; Trionycis Carapax 20 g; Lycii Cortex 23 g; Glehniae Radix 39 g; Glycyrrhizae Radix et Rhizoma 12 g; Artemisiae Annuae Herba 29 g; Ophiopogonis Radix 39 g; Cinnamomi Ramulus 8 g; Zingiberis Rhizoma 8 g; Aconiti Lateralis Radix Praeparata 8 g; Trichosanthis Fructus 29 g; Farfarae Flos 20 g; Asteris Radix et Rhizoma 20 g; Cortex Mori 23 g; Arisaema Cum Bile 8 g; Astragali Radix 20 g; Lycii Fructus 20 g.

**Procedure** Decoct Astragali Radix, Lycii Cortex, Glehniae Radix, Ophiopogonis Radix, Glycyrrhizae Radix et Rhizoma,

Artemisiae Annuae Herba, Cinnamomi Ramulus, Trichosanthis Fructus, Asteris Radix et Rhizoma and Cortex Mori with water twice, 2 hours for each time, combine the decoctions, filter and concentrate to form a thin extract with a relative density of 1.26-1.30 (80°C). Pulverize the other ingredients to fine powder, mix thoroughly with the above thin extract and a quantity of sucrose, make granules dry and make to 1000 g.

**Description** Yellowish-brown to dark brown granules; taste, sweet.

**Identification** (1) Microscopical: Irregular branched masses colourless, dissolved gradually on mounting in chloral hydrate solution; hyphae colourless or pale brown (Poria). Pollen granules spheroidal, 28-40  $\mu$ m in diameter, showing spiny sculptures on the exine, spines relatively sharpened (Farfarae Flos). Stone cells of testa irregular polygonal in surface view, anticlinal walls deep sinuous or slightly waved, with distinct striations (Lycii Fructus).

(2) Pulverize 50 g of the granules, add 120 ml of methanol, heat under reflux for 2 hours, filter, and evaporate the filtrate to dryness, dissolve the residue in 30 ml of 7% solution of sulfuric acid, and heat under reflux for 1 hour, extract with three 20-ml quantities of petroleum ether (60-90°C) by shaking, and combine the petroleum ether extract. Wash with three 20-ml quantities of water, combine the petroleum ether extract, evaporate to dryness, and dissolve the residue in 1 ml of dehydrated ethanol as the test solution. Prepare a solution with 1 g of Ginseng Radix et Rhizoma reference drug in 30 ml of methanol in the same manner as the reference drug solution. Dissolve panaxotriol CRS in ethanol to produce a solution containing 1 mg per ml as the reference solution. Carry out the method for thin layer chromatography (0502), using silica gel G as the coating substance and a mixture of toluene and acetone (2:1) as the mobile phase. Apply separately 10  $\mu$ l of each of the above three solutions to the plate. After developing, remove the plate, dry in the air. Spray with a solution of sulfuric acid in ethanol (1 $\rightarrow$ 10), heat at 100°C to the spots clear, and examine separately in daylight and under ultraviolet light at 365 nm. The spots in the chromatogram obtained with the test solution correspond in position and colour to the spots in the chromatogram obtained with the reference drug solution and reference solution in day light. Examine under ultraviolet light, the same fluorescent spots are shown.

(3) Pulverize 15 g of the granules, ultrasonicate in 50 ml of *n*-butanol saturated with water for 30 minutes, filter, and wash the filtrate with three 20-ml quantities of water, and discard the washings. Evaporate the *n*-butanol extract to dryness, and dissolve the residue in 1 ml of methanol as the test solution. Weigh 0.5 g of *Attractylodis Macrocephalae Rhizoma* reference drug, decoct with water for 2 hours, filter, extract the filtrate with three 15-ml quantities of *n*-butanol saturated with water by shaking, combine the *n*-butanol extract, evaporate the *n*-butanol extract to dryness, and dissolve the residue in 1 ml of methanol as the reference drug solution. Carry out the method for thin layer chromatography (0502), using silica gel G as the coating substance and a mixture of chloroform, acetone and formic acid (9.5:0.5:0.06) as the mobile phase. Apply separately 5  $\mu$ l of each of the above two solutions to the plate. After developing, remove the plate, dry in the air. Examine under ultraviolet light at 365 nm. A blue fluorescent spot in the chromatogram obtained with the test solution corresponds in position and colour to the blue fluorescent spot in the chromatogram obtained with the

reference drug solution.

(4) Pulverize 10 g of the granules, add 30 ml of methanol, heat under reflux for 1 hour, filter, and evaporate the filtrate to dryness, dissolve the residue in 4 ml of methanol, filter and use the filtrate as the test solution. Dissolve synephrine CRS in methanol to produce a solution containing 1 mg per ml as the reference solution. Carry out the method for thin layer chromatography (0502), using silica gel G as the coating substance and a mixture of chloroform, acetone, methanol and concentrated ammonium TS (13 : 4 : 3 : 0.5) as the mobile phase. Apply separately 5  $\mu$ l of each of the above two solutions to the plate. After developing, remove the plate, dry in the air. Spray with a 0.5% solution of ninhydrine in ethanol, heat at 105°C to the spots clear and examine in daylight. The spot in the chromatogram obtained with the test solution corresponds in position and colour to the spot in the chromatogram obtained with the reference solution.

(5) Pulverize 10 g of the granules, ultrasonicate in 30 ml of chloroform for 20 minutes, filter, and evaporate the filtrate to dryness, dissolve the residue in 1 ml of chloroform as the test solution. Weigh 0.5 g of *Artemisiae Annuae* Herba reference drug, decoct with water for 30 minutes, filter, and evaporate the filtrate to dryness, dissolve the residue in 20 ml of chloroform by stirring, filter, and evaporate the filtrate to dryness, and dissolve the residue in 1 ml of chloroform as the reference drug solution. Carry out the method for thin layer chromatography (0502), using silica gel G as the coating substance and a mixture of chloroform and methanol (18 : 0.5) as the mobile phase. Apply separately 5  $\mu$ l of each of the above two solutions to the plate. After developing, remove the plate and dry in air. Examine under ultraviolet light at 365 nm. A blue fluorescent spot in the chromatogram obtained with the test solution corresponds in position and colour to the blue fluorescent spot in the chromatogram obtained with the reference drug solution.

(6) Pulverize 5 g of the granules, ultrasonicate in 20 ml of methanol for 20 minutes, filter, and evaporate the filtrate to dryness. Dissolve the residue in 10 ml of water, add 1 ml of hydrochloric acid, heat on water bath for 30 minutes, cool immediately, extract with two 20-ml quantities of ether by shaking, and combine the ether extract. Evaporate the ether extract to dryness, and dissolve the residue in 1 ml of chloroform as the test solution. Prepare a solution with 0.1 g of *Rhei Radix et Rhizoma* reference drug in the same manner as the reference drug solution. Dissolve emodin CRS in methanol to produce a solution containing 1 mg per ml as the reference solution. Carry out the method for thin layer chromatography (0502), using silica gel G as the coating substance and the upper layer of a mixture of petroleum ether (30-60°C), ethyl formate and formic acid (15 : 5 : 1) as the mobile phase. Apply separately 3  $\mu$ l of each of the above three solutions to the plate. After developing, remove the plate, dry in the air. Examine under ultraviolet light at 365 nm. Five orange fluorescent spots in the chromatogram obtained with the test solution correspond in position and colour to the fluorescent spots in the chromatogram obtained with the reference drug solution. The orange fluorescent spot in the chromatogram obtained with the test solution corresponds in position and colour to the orange fluorescent spot in the chromatogram obtained with the reference solution. Upon exposure to ammonia vapour, the spot turns red in daylight.

(7) Pulverize 50 g of the granules, ultrasonicate in 100 ml of methanol for 1 hour, filter, and evaporate the filtrate to dryness, dissolve the residue in 50 ml of water, extract with

four 50-ml quantities of ethyl acetate by shaking, and combine the ethyl acetate extract. Evaporate the ethyl acetate extract to dryness, and dissolve the residue in 1 ml of methanol as the test solution. Weigh 1 g of *Farfarae Flos* reference drug, add 20 ml of methanol, ultrasonicate for 30 minutes, filter, and concentrate the filtrate to 1 ml as the reference drug solution. Carry out the method for thin layer chromatography (0502), using silica gel GF<sub>254</sub> as the coating substance and a mixture of petroleum ether (60-90°C) and acetone (6 : 1) as the mobile phase. Apply separately 5  $\mu$ l of each of the above two solutions to the plate. After developing, remove the plate, dry in the air. Examine under ultraviolet light at 254 nm. The fluorescent spots in the chromatogram obtained with the test solution correspond in position and colour to the fluorescent spots in the chromatogram obtained with the reference drug solution.

(8) Weigh 1 g of *Lycii Fructus* reference drug, add 30 ml of methanol, ultrasonicate for 30 minutes, filter, and concentrate the filtrate to 1 ml as the reference drug solution. Carry out the method for thin layer chromatography (0502), using silica gel G as the coating substance and a mixture of ethyl acetate, chloroform and formic acid (3 : 3 : 1) as the mobile phase. Apply separately 5  $\mu$ l of the test solution obtained under *Identification* (7) and the reference drug solution to the plate. After developing, remove the plate, dry in the air. Examine under ultraviolet light at 365 nm. The fluorescent spots in the chromatogram obtained with the test solution correspond in position and colour to the fluorescent spots in the chromatogram obtained with the reference drug solution.

**Limit test for aconitine** Pulverize a quantity of the containing to fine powder, weigh 36 g of the powder to a stoppered conical flask, moisten with 10 ml of concentrated ammonia TS, add 80 ml of chloroform, ultrasonicate for 30 minutes, filter and the filtrate evaporated to dryness. Dissolve the residue in 30 ml 3% solution of sulfuric acid, extract the filtrate with three 40 ml quantities of chloroform by shaking, discard the chloroform solution, adjust pH of the water layer to 10 with concentrated ammonia TS, and extract with five 30-ml quantities of chloroform. Combine and recover solvent, dissolve the residue with a quantity of chloroform, transfer to a 2 ml volumetric flask, dilute to the volume and mix well as the test solution. Dissolve aconitine CRS in chloroform to produce a solution containing 1.5 mg per ml as the reference solution. Carry out the method for thin layer chromatography (0502), using silica gel G as the coating substance and a mixture of cyclohexane, ethyl acetate and methanol (6.4 : 3.6 : 1) as the mobile phase. Apply separately 5  $\mu$ l of the test solution and the reference solution to the plate. After developing in the chamber pre-equilibrated for 2 hours and removal of the plate, dry in air, spray with diluted solution of potassium hepta-iodobismuthate TS. The spots in the chromatogram obtained with the test solution are smaller or no in position and colour than the spots in chromatogram obtained with the reference solution.

**Other requirements** Comply with the general requirements for granules (0104).

**Assay** Carry out the method for high performance liquid chromatography (0512).

**Chromatographic system and system suitability** Use octadecylsilane bonded silica gel as the stationary phase and a mixture of methanol and 5% acetic acid solution (33 : 67) as the mobile phase. As detector a spectrophotometer set at 283 nm. The number of theoretical plates of the column is
